# Supplementary material
Source: publisher site journal article supplement (https://www.dovepress.com/article/418145)

# Supplementary Tables and figures

**Table S1** Key studies used to initiate pearl-growing

| **Title** | **Author(s)** | **Year published** | **Study type** | **DOI** |
| --- | --- | --- | --- | --- |
| Eosinophilic and Noneosinophilic Asthma  An Expert Consensus Framework to Characterize Phenotypes in a Global Real-Life Severe Asthma Cohort15 | Heaney et al. | 2021 | Real-world evidence | 10.1016/j.chest.2021.04.013 |
| Prevalence and characterization of severe asthma in Hungary16 | Csoma et al. | 2020 | Real-world evidence | 10.1038/s41598-020-66445-4 |
| Challenges faced in managing adult asthma: A perspective from Asian countries17 | Dhar et al. | 2020 | Review | 10.1111/resp.13935 |
| Asthma inflammatory phenotypes on four continents: most asthma cases are non-eosinophilic18 | Pembrey et al. | 2020 | Real-world evidence | 10.1093/ije/dyac173 |
| In-Depth Review of Allergic Rhinitis19 | Sullivan et al. | 2020 | Review | Not available |
| The characterization of asthma with blood eosinophilia in adults in Latin America20 | Bedolla-Barajas et al. | 2019 | Real-world evidence | 10.1080/02770903.2018.1520863 |
| National and regional asthma programmes in Europe21 | Selroos et al. | 2015 | Review | 10.1183/16000617.00008114 |
| An estimate of asthma prevalence in Africa: a systematic analysis22 | Adeloye et al. | 2013 | Review | 10.3325/cmj.2013.54.519 |
| Nasal polyposis in patients with asthma and allergic rhinitis23 | Ahmadiafshar et al. | 2012 | Real-world evidence | 10.1017/S0022215112000771 |

**Figure S1** Methodology for determining the prevalence of key clinical subgroups with asthma (those with EA, SA, NR, and NPs)

**
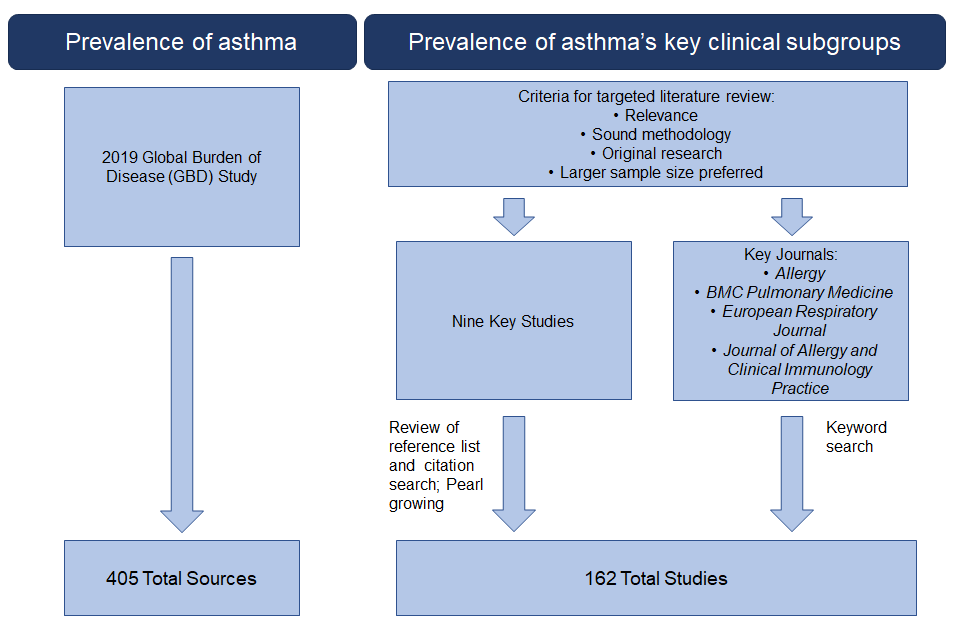
**

To determine the prevalence of asthma’s key clinical subgroups, a pearl-growing method was used alongside keyword searches of relevant journals. The pearl-growing process was initiated using 9 key studies (Table S1), while the key journals of Allergy, BMC Pulmonary Medicine, the European Respiratory Journal, and the Journal of Allergy and Clinical Immunology Practice were used for keyword searches. A total of 162 studies were included.

**Figure S2** The global prevalence of AR within asthma.


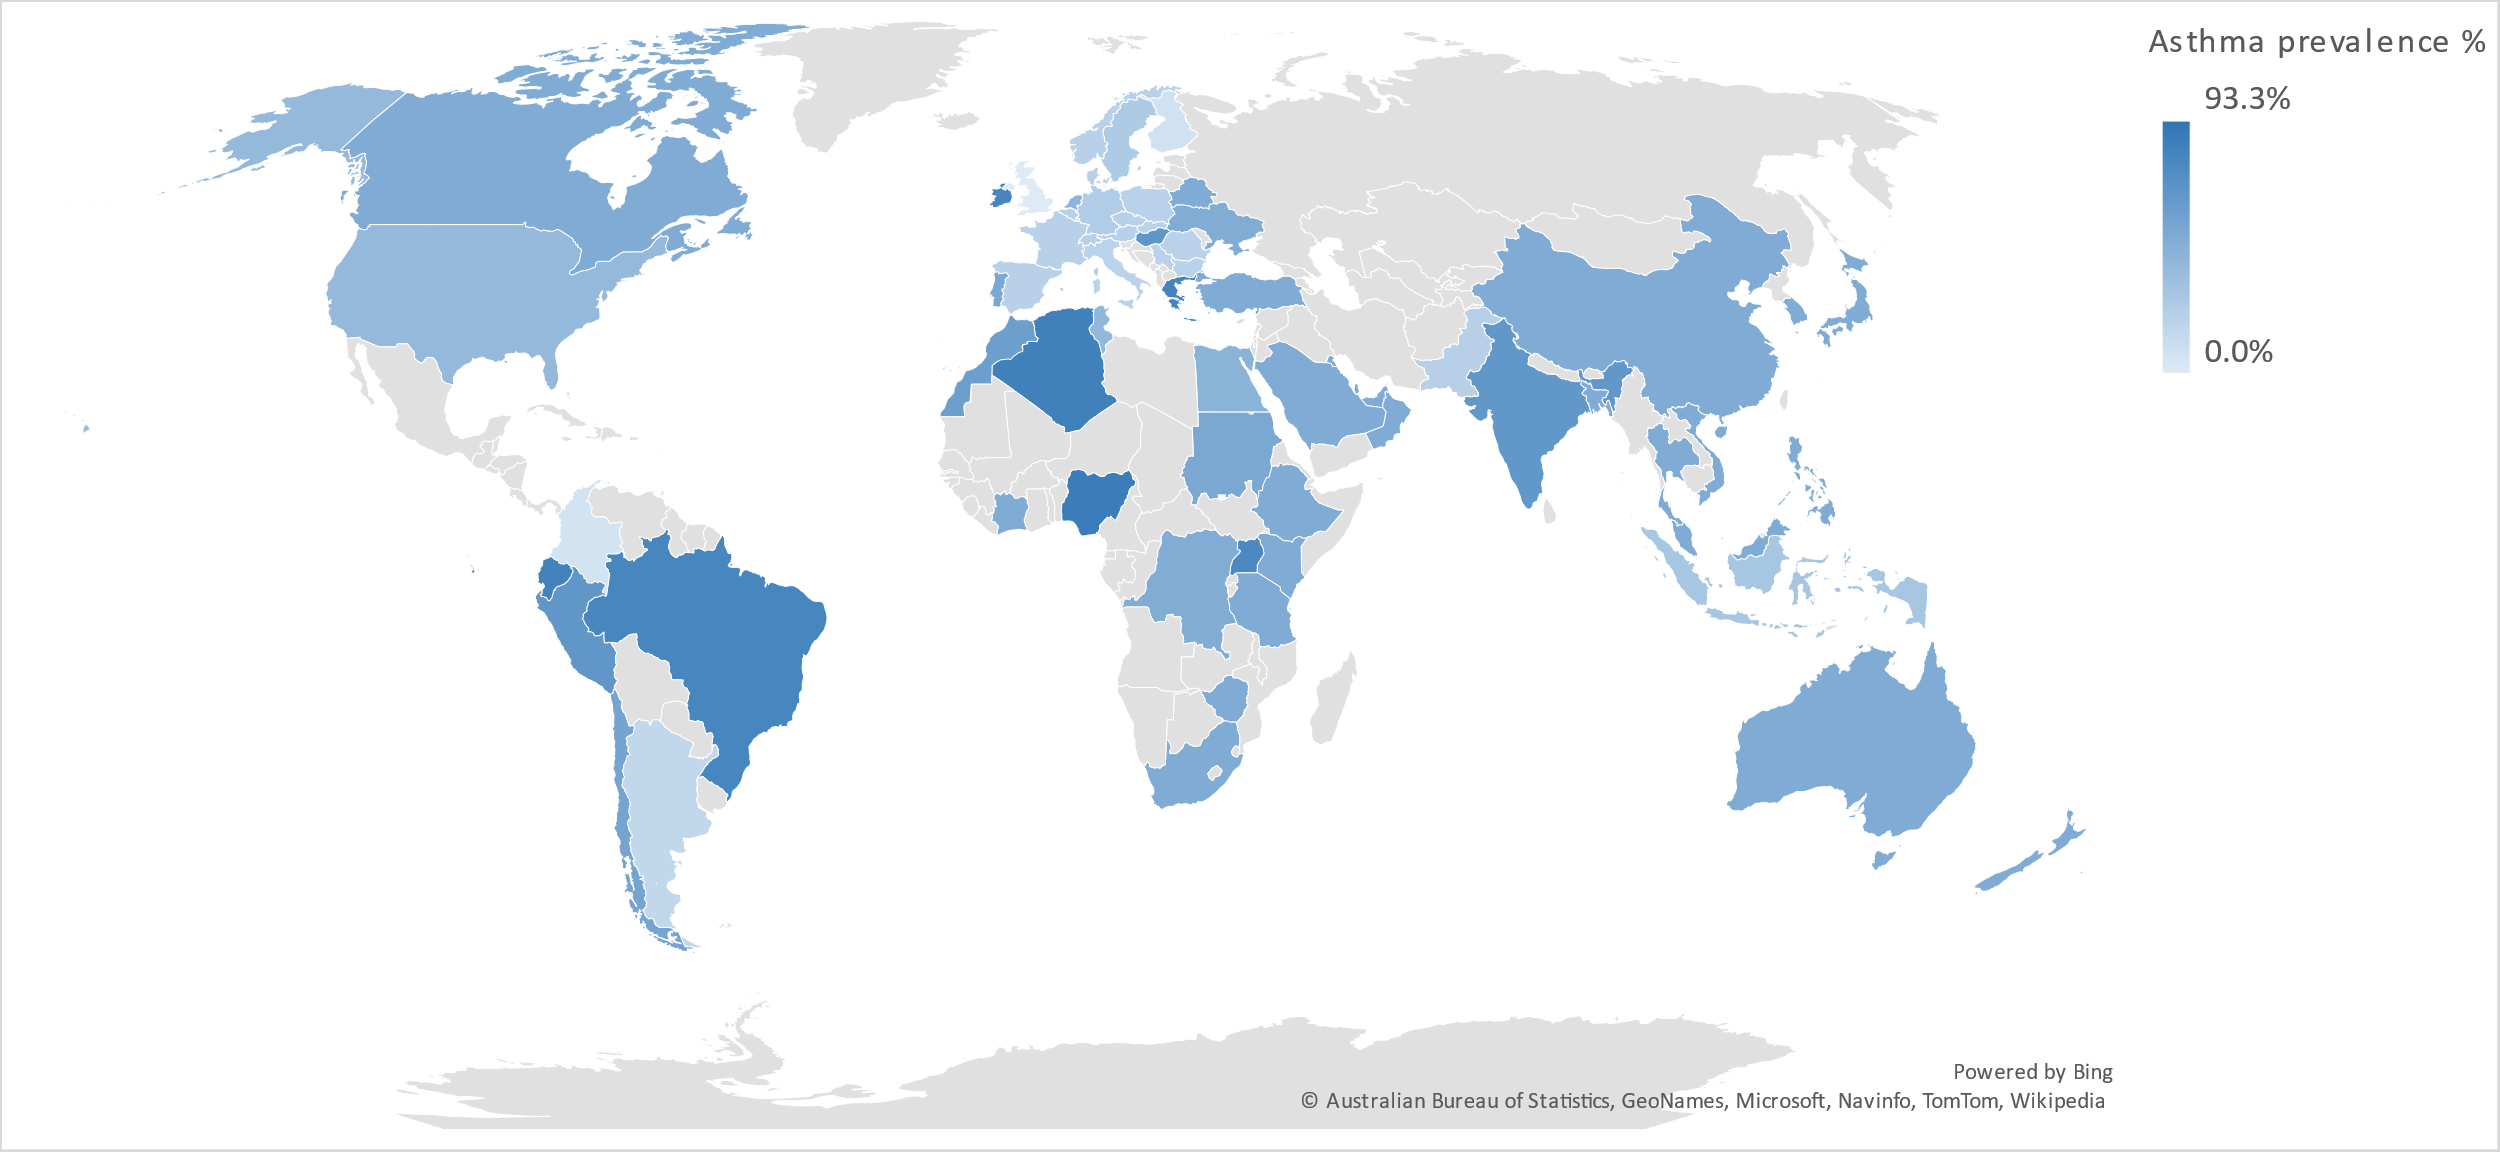


**Figure S3** The global prevalence of EA within asthma.


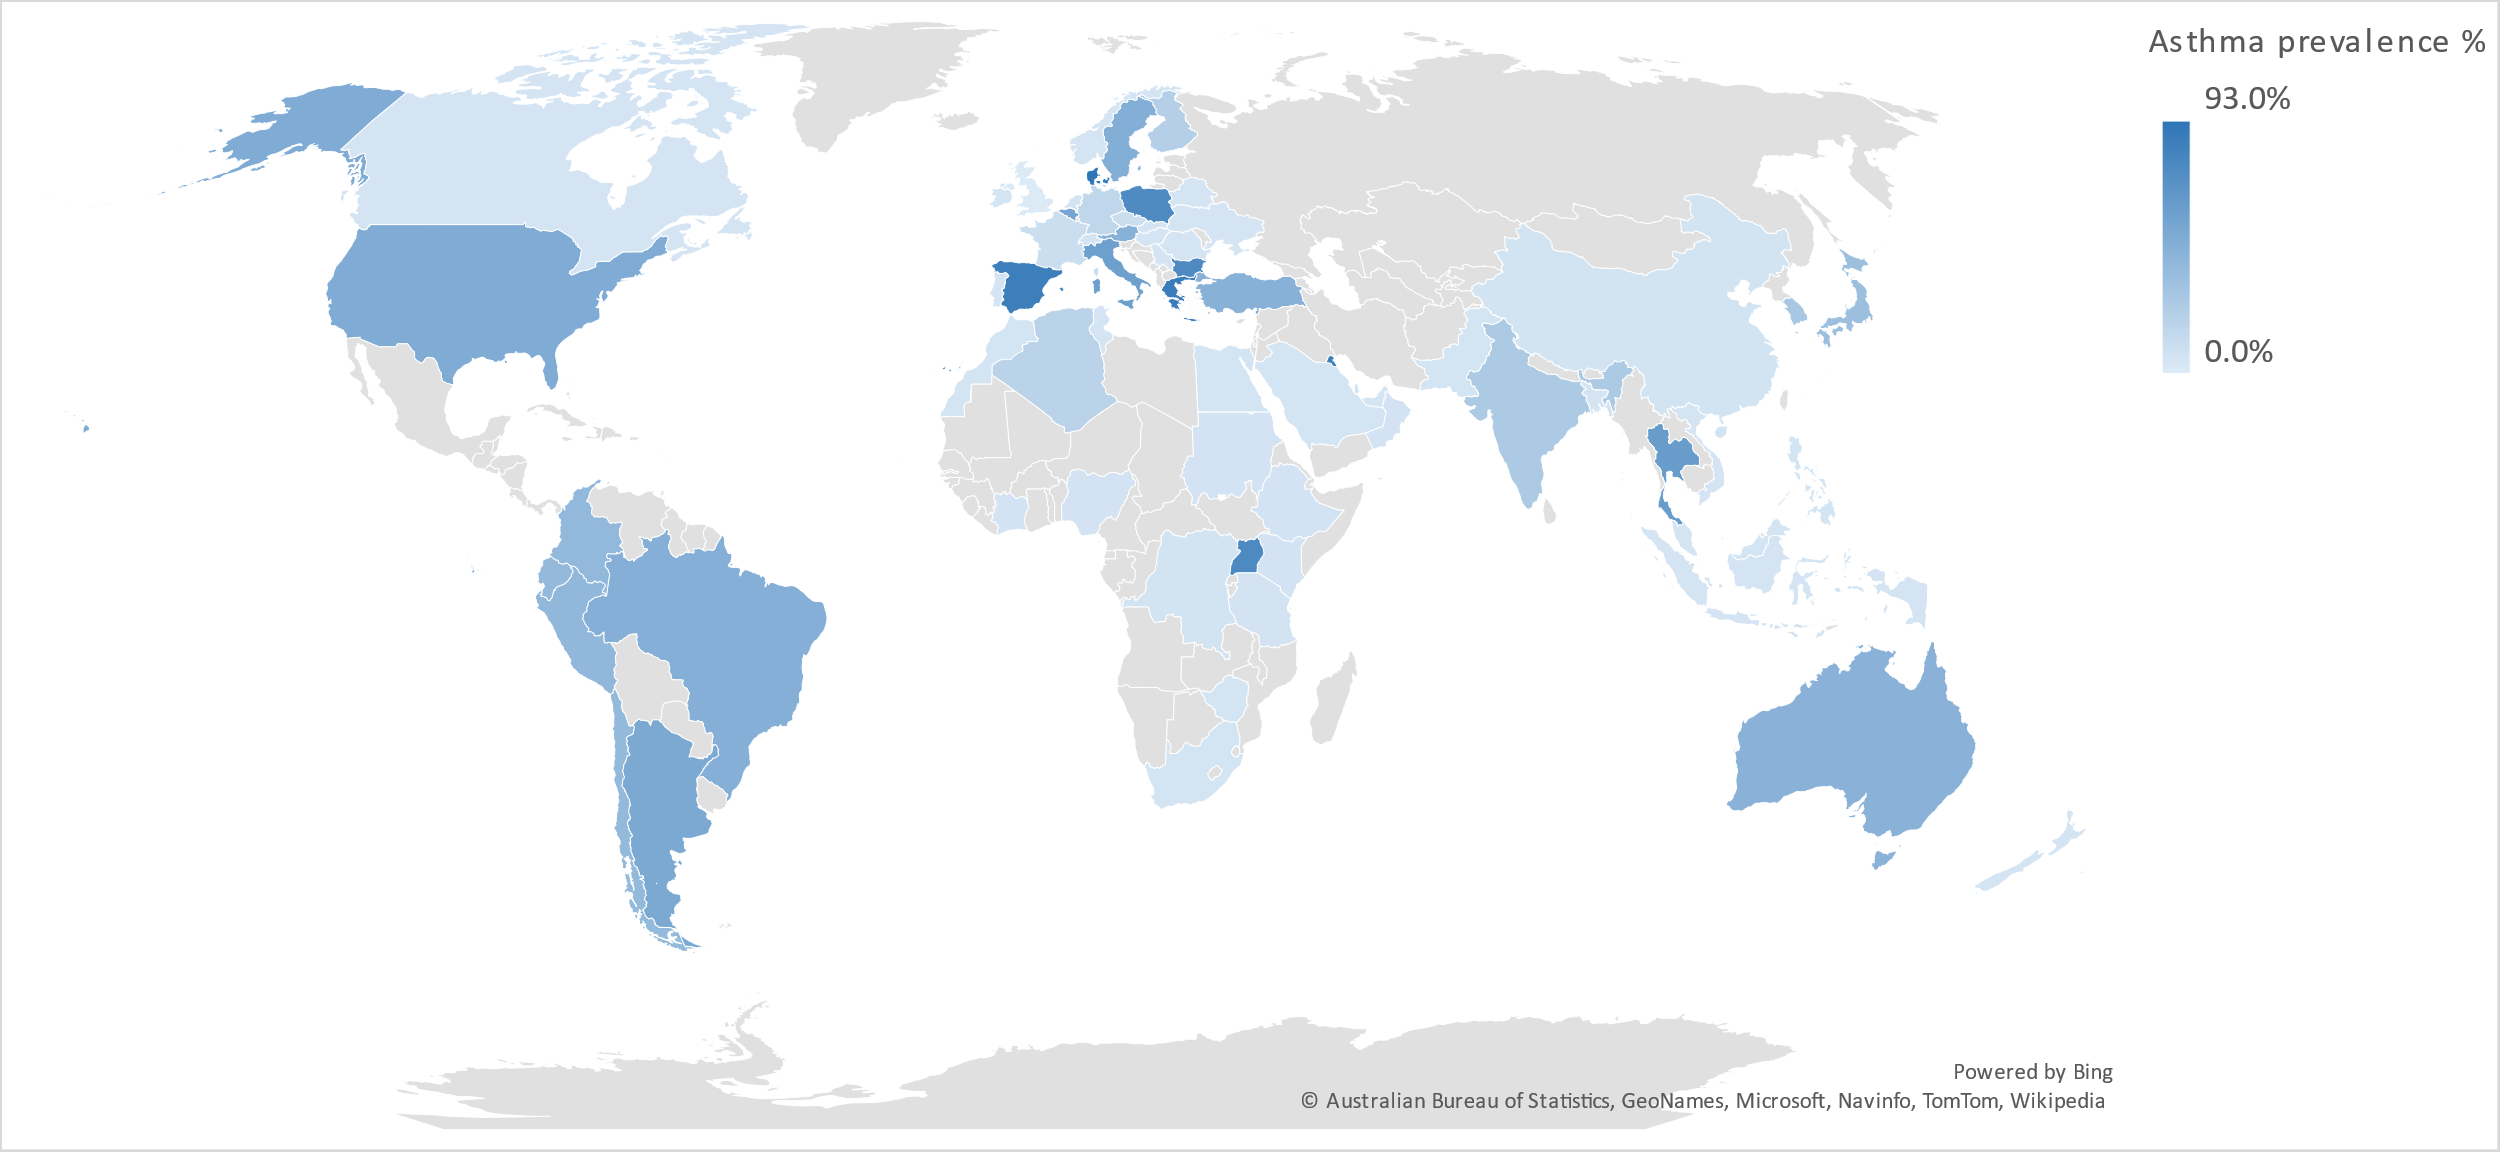


**Figure S4** The global prevalence of SA within asthma.


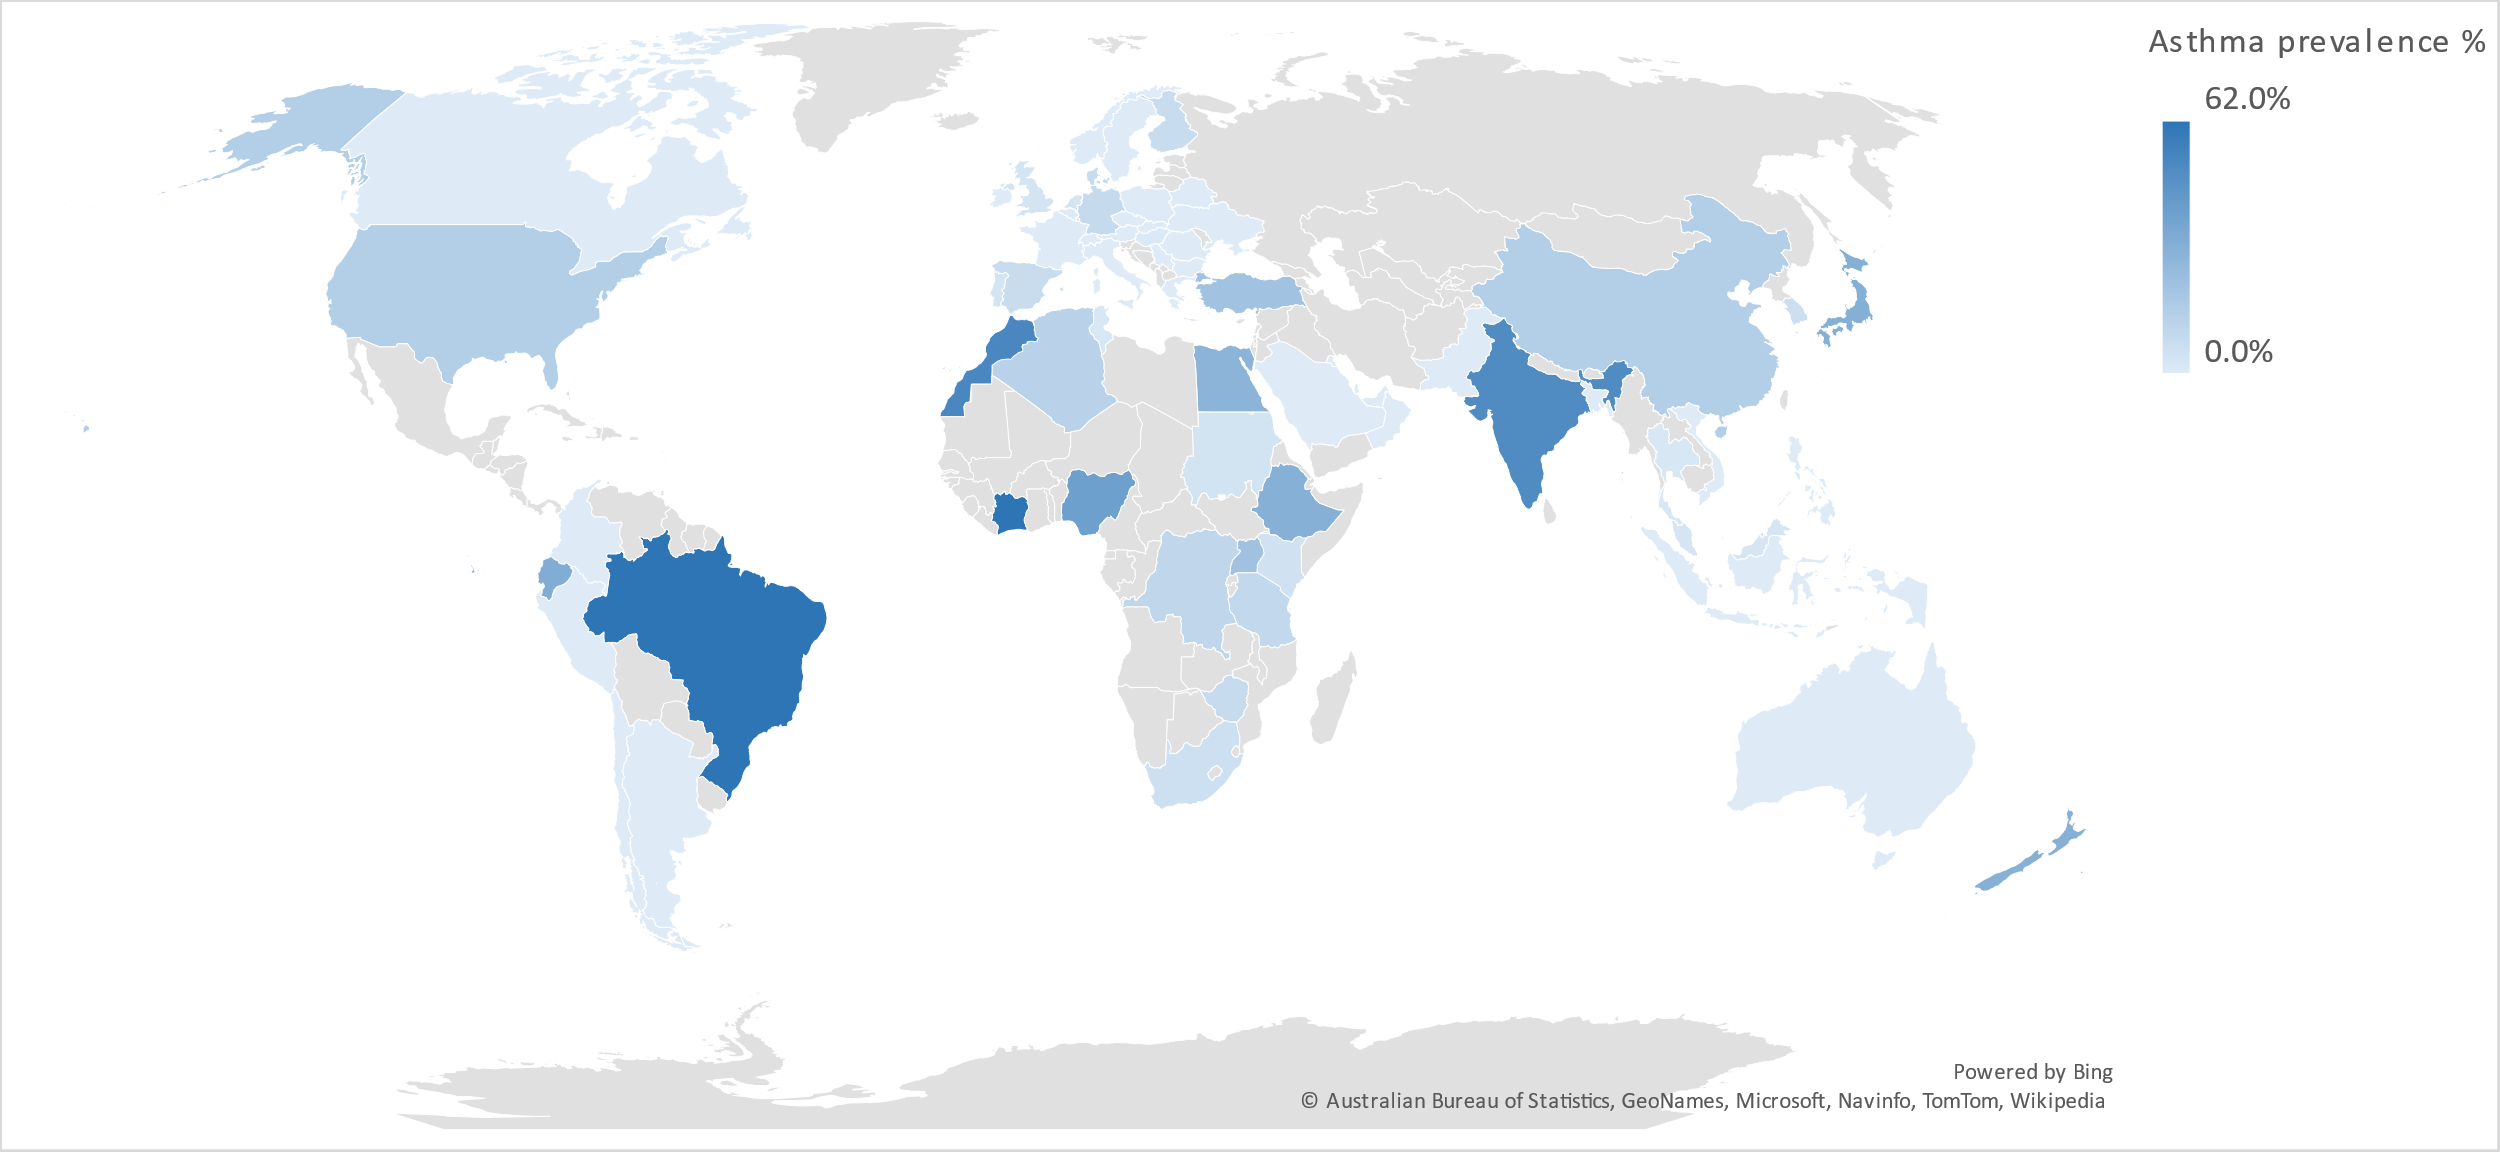


**Figure S5** The global prevalence of NPs within asthma.


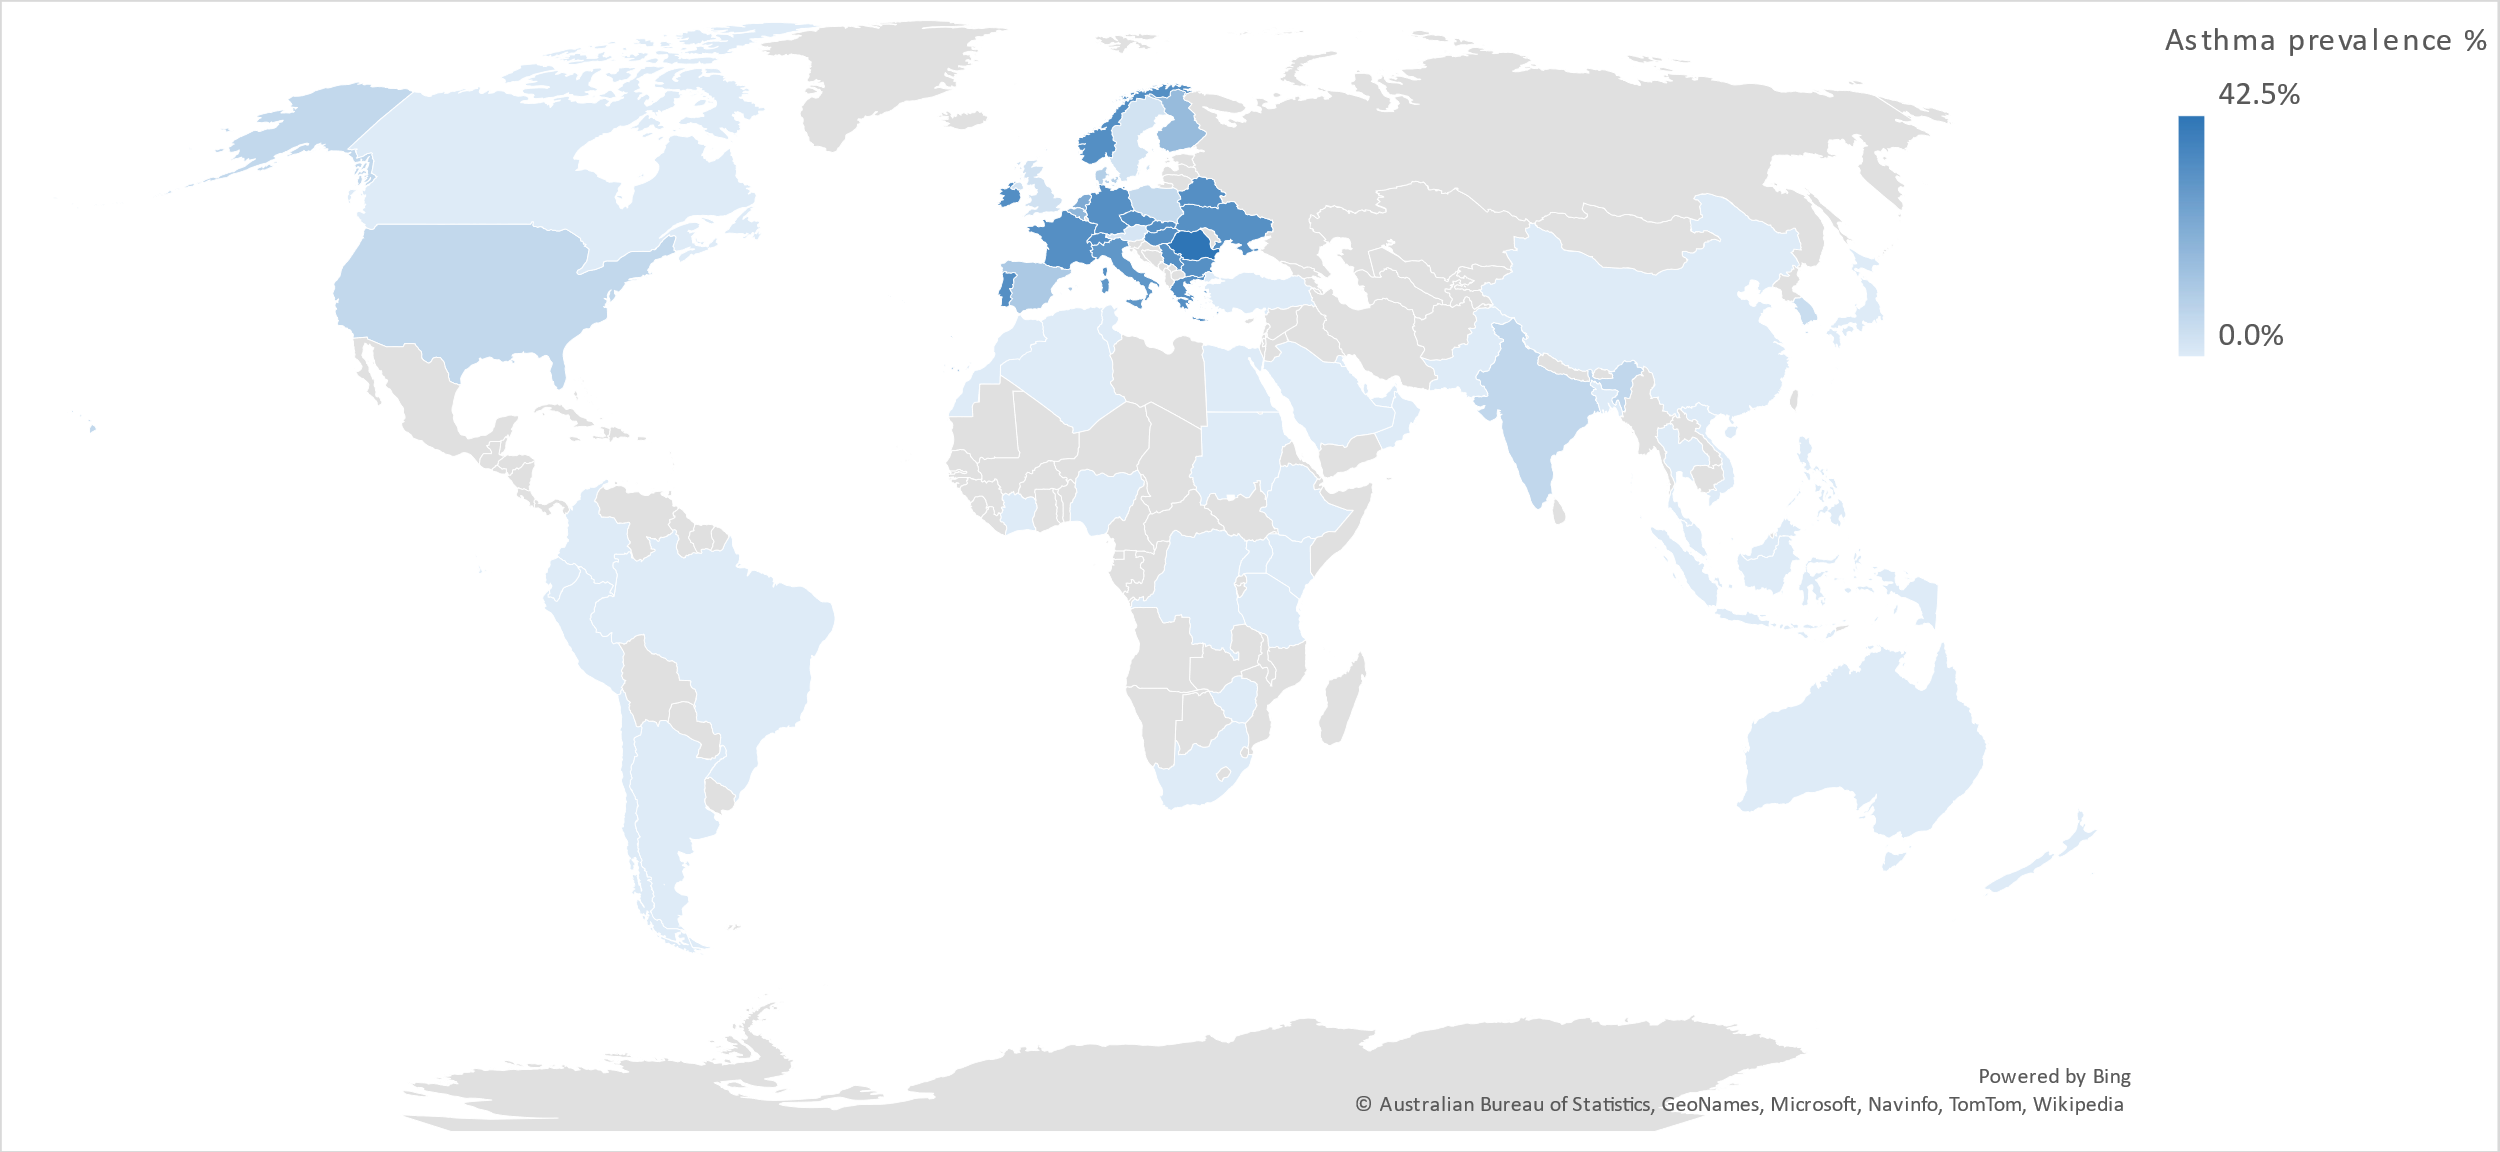

Supplement: Supplementary file 1 [file get_supplementary_file.php]
